# Supplementary material for: Selective detection of chemical warfare agents VX and Sarin by the short wavelength inner filter technique (SWIFT)
Source: Royal Society of Chemistry journal article supplement (doi:10.1039/d0cc06948e), 2020-01-01
Supplement: d0cc06948e1.pdf [file d0cc06948e1.pdf]

## Selective Detection of Chemical Warfare Agents VX and Sarin by Short Wavelength Inner Filter Technique (SWIFT)

### Supporting Information

Orit Redy Keisar,<sup>a</sup> Alexander Pevzner,<sup>b</sup> Abhishek Baheti,<sup>c</sup> Arkadi Vigalok\*<sup>c</sup> and  
Nissan Ashkenazi\*<sup>a</sup>

<sup>a</sup> Department of Organic Chemistry, IIBR-Israel Institute for Biological Research,  
P.O.Box 19, Ness Ziona, 7410001, Israel. E-Mail: [Nissan.ashkenazi@iibr.gov.il](mailto:Nissan.ashkenazi@iibr.gov.il)

<sup>b</sup> Department of Physical Chemistry, IIBR-Israel Institute for Biological Research,  
P.O.Box 19, Ness Ziona, 7410001, Israel.

<sup>c</sup> School of Chemistry, The Sackler Faculty of Exact Sciences, Tel Aviv University, Tel

Aviv 69978, Israel. E-mail: [avigal@tauex.tau.ac.il](mailto:avigal@tauex.tau.ac.il)

## Chemicals

VX, Me-VX and GB and were synthesized locally at IIBR (>99% purity).

**Warning!! These chemicals are extremely toxic and should be handled only by qualified personal using the adequate protecting gear.**

BODIPY dye (1), Ellman's reagent (2), 2-diisopropyl-aminothane thiol, thiophenol and 2-methoxythiophenol were purchased from Sigma Aldrich and used without further purification.

Silylated *p*-nitrophenol (4) was synthesized as reported previously (A. Baheti and A. Vigalok *J. Am. Chem. Soc.* **2019**, *141*, 12224.).

## NMR spectroscopy

$^{13}\text{C}\{^1\text{H}\}$  and  $^{31}\text{P}\{^1\text{H}\}$  spectra were obtained at 125 and 202 MHz, respectively, at room temperature on a 11.7 T (500 MHz) Bruker spectrometer (Avance III HD). Chemical shifts were calibrated to TMS (for  $^{13}\text{C}$ ) and trimethyl phosphate (for  $^{31}\text{P}$ ) as 0 ppm. The spectra were recorded using the standard parameters of the TopSpin NMR software (version 3.5).

NMR Experiments: **GB** (2 mg, 14 mmol) and **4** (10 mg, 27 mmol) were dissolved in 99.8%  $\text{CD}_3\text{OD}$  (0.5 ml) containing 0.02% water. The solution was kept at rt and the  $^{31}\text{P}$  and  $^{19}\text{F}$  spectra were recorded at  $t=0$  and 60 min. Only a small (4%>) decomposition of **GB** to *i*-propyl methylphosphonic acid could be observed (Fig. S15-S16 bellow).

## Absorbance and emission measurements

UV-Vis spectra of all compounds were acquired using a Shimadzu UV-2401 dual-beam spectrophotometer equipped with halogen and deuterium lamps (190 nm–900 nm range), with a resolution of 0.1 nm.

The fluorescence spectra were collected by JASCO FP-8300 spectrofluorometer equipped with a Xenon arc lamp as the source of UV radiation and 1.0 cm path length cuvette (4 ml in volume). The excitation and emission slit widths was set at 5 nm.

Visualization of the compounds was performed with 365nm LED lamp (pE-100-365nm, CoolLED, Andover, UK).

## Absorption and emission spectra

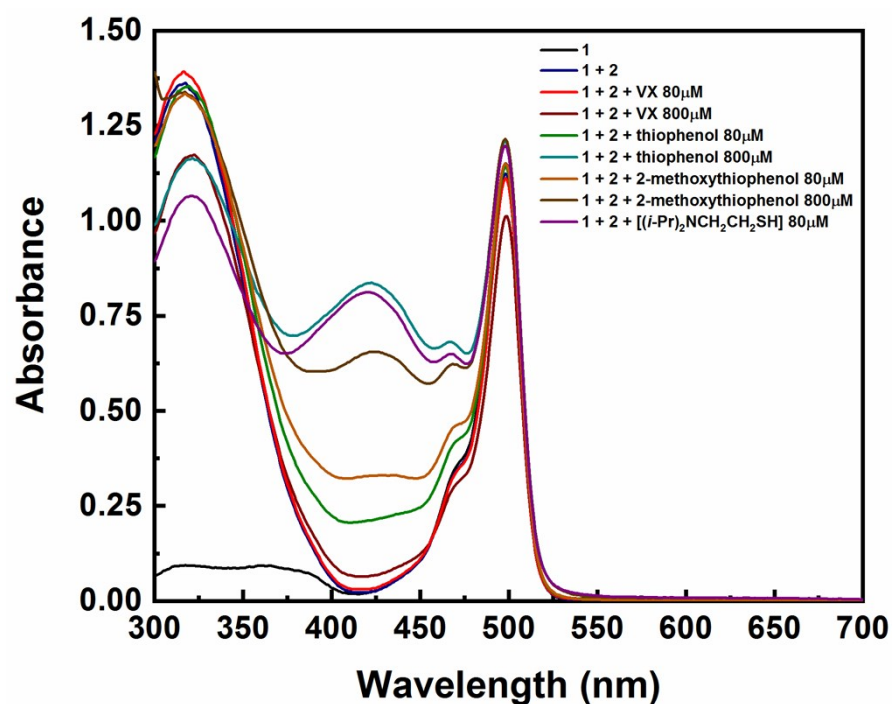

**Figure S1.** Absorption spectra of **1** (20  $\mu\text{M}$ ) with **2** (80  $\mu\text{M}$ ) and VX (80/800 $\mu\text{M}$ ) or different thiols (80 $\mu\text{M}$ ) recorded in EtOH:H<sub>2</sub>O (1:1).

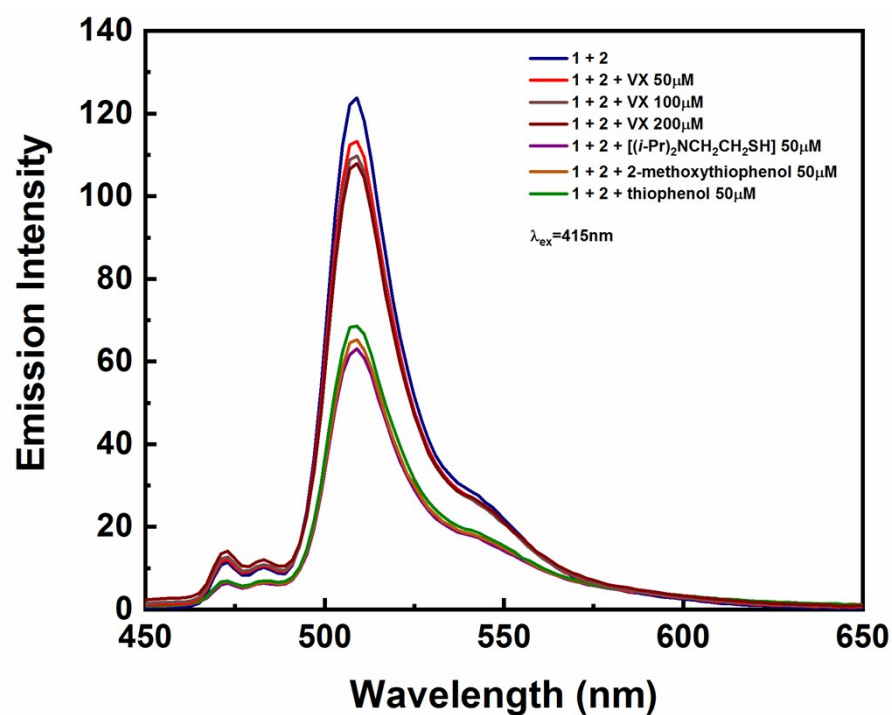

**Figure S2.** Emission spectra of **1** (0.1  $\mu\text{M}$ ) with **2** (15  $\mu\text{M}$ ) and VX (50/100/200 $\mu\text{M}$ ) or different thiols (50 $\mu\text{M}$ ) recorded in EtOH:H<sub>2</sub>O (1:1),  $\lambda_{\text{ex}}=415\text{nm}$ .

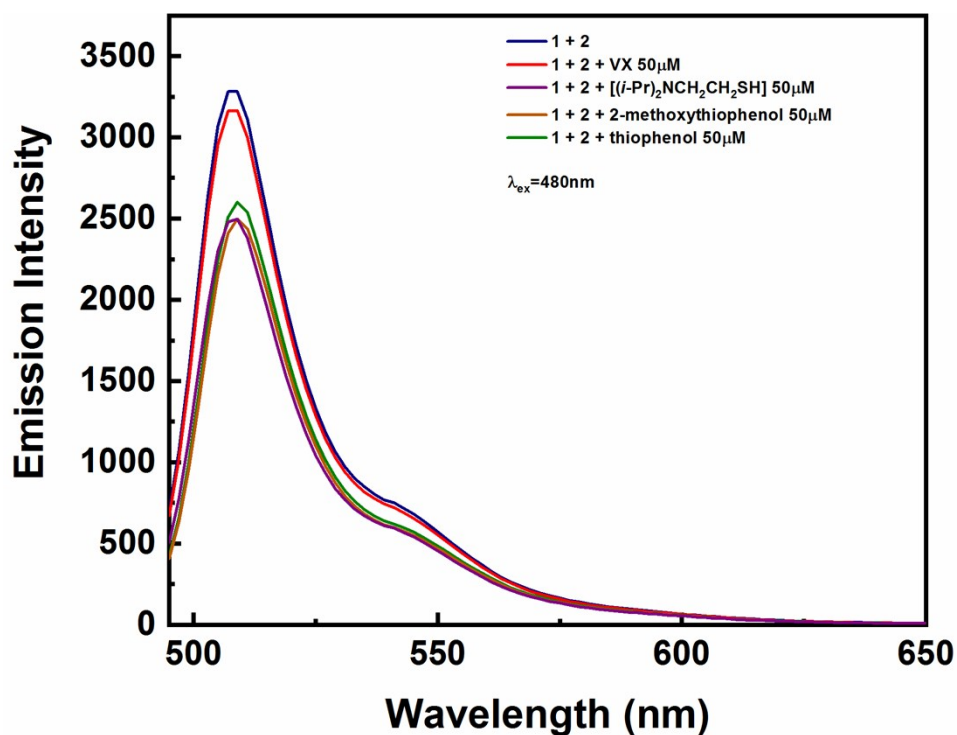

**Figure S3.** Emission spectra of **1** (0.1  $\mu\text{M}$ ) with **2** (15  $\mu\text{M}$ ) and VX or different thiols (50 $\mu\text{M}$ ) recorded in EtOH:H<sub>2</sub>O (1:1),  $\lambda_{\text{ex}}$ =480nm.

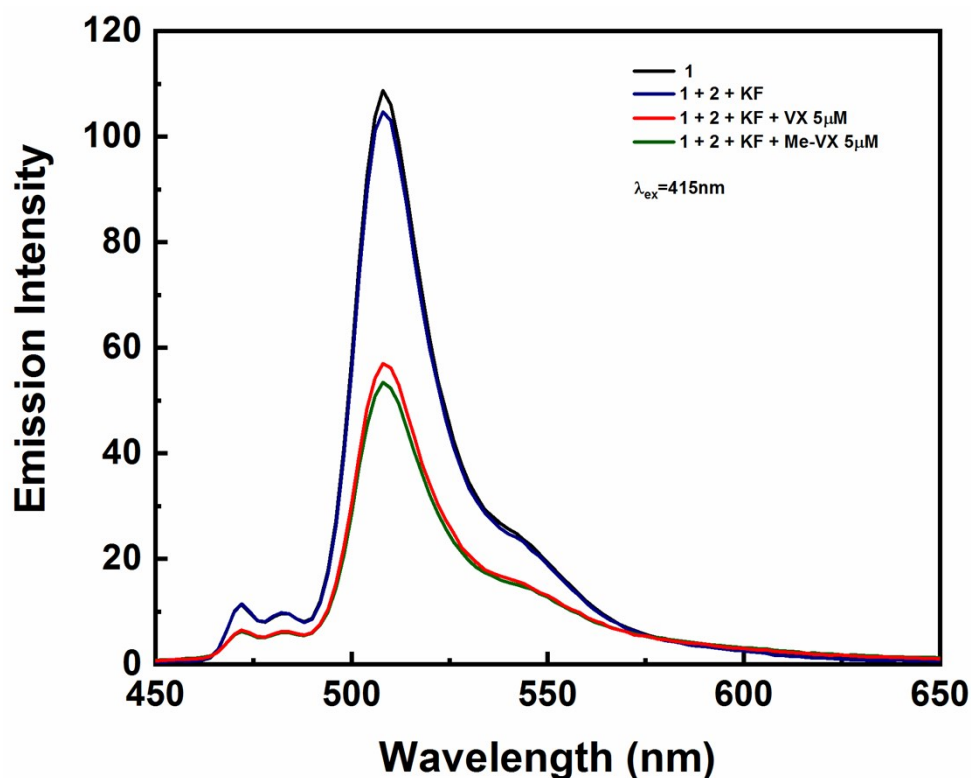

**Figure S4.** Emission spectra of **1** (0.1  $\mu\text{M}$ ) with **2** (80  $\mu\text{M}$ ), KF (80mM) and VX or Me-VX (5 $\mu\text{M}$ ) recorded in EtOH:H<sub>2</sub>O (1:1),  $t=30$  min,  $\lambda_{\text{ex}}$ =415nm.

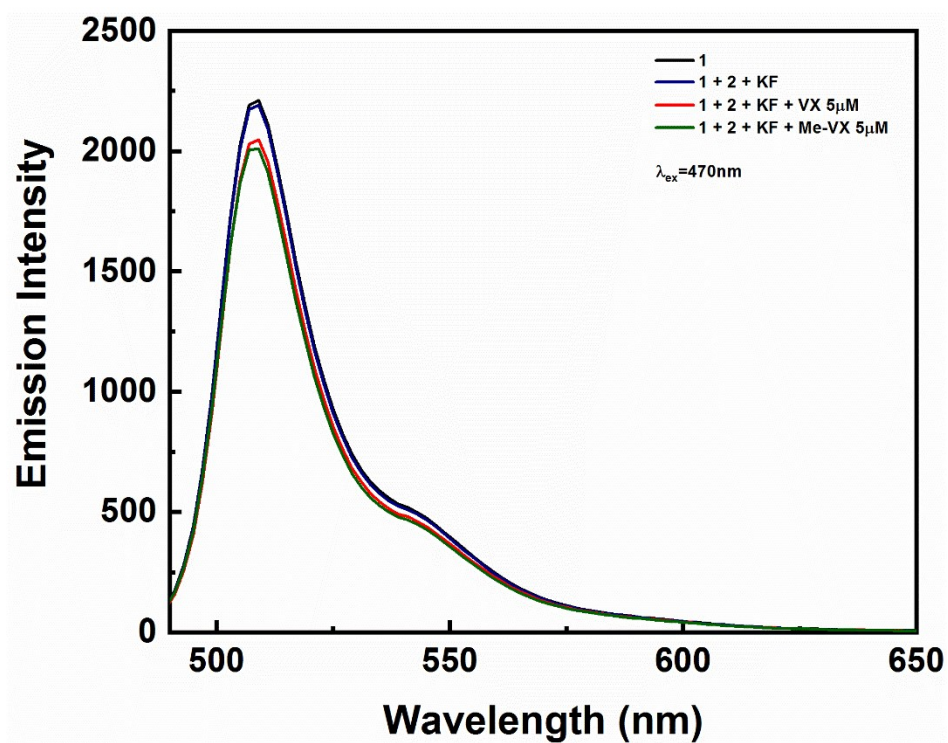

**Figure S5.** Emission spectra of **1** (0.1  $\mu\text{M}$ ) with **2** (80  $\mu\text{M}$ ), KF (80mM) and VX or Me-VX (5 $\mu\text{M}$ ) recorded in EtOH:H<sub>2</sub>O (1:1), t=30 min,  $\lambda_{\text{ex}}$ =470nm.

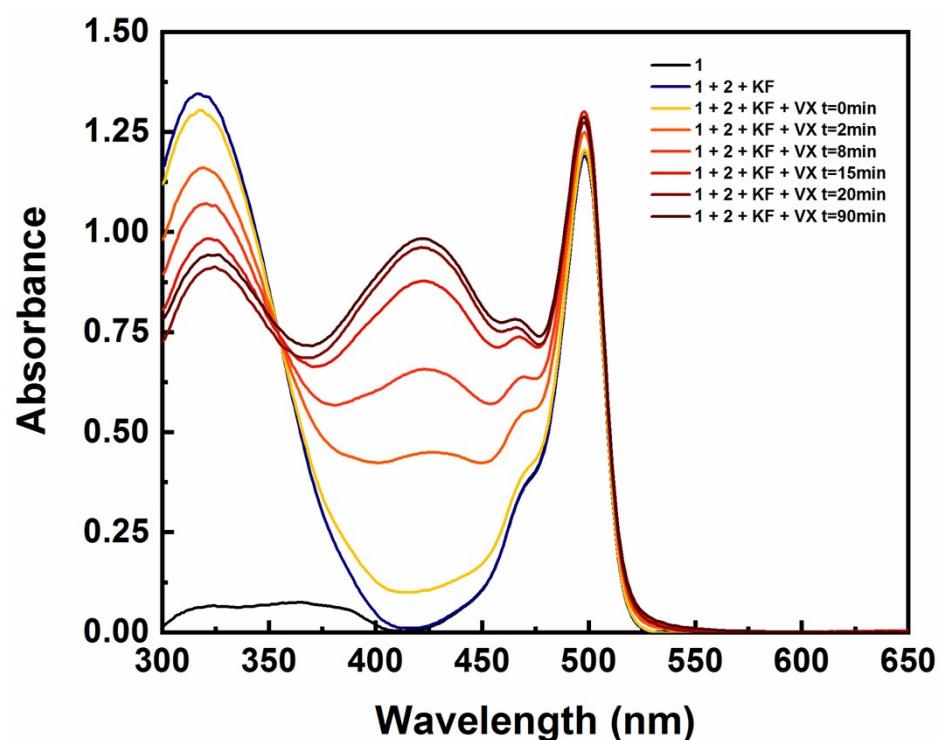

**Figure S6.** Absorption spectra of **1** (20  $\mu\text{M}$ ) with **2** (80  $\mu\text{M}$ ), KF (80mM) and VX (80 $\mu\text{M}$ ) recorded in EtOH:H<sub>2</sub>O (1:1).

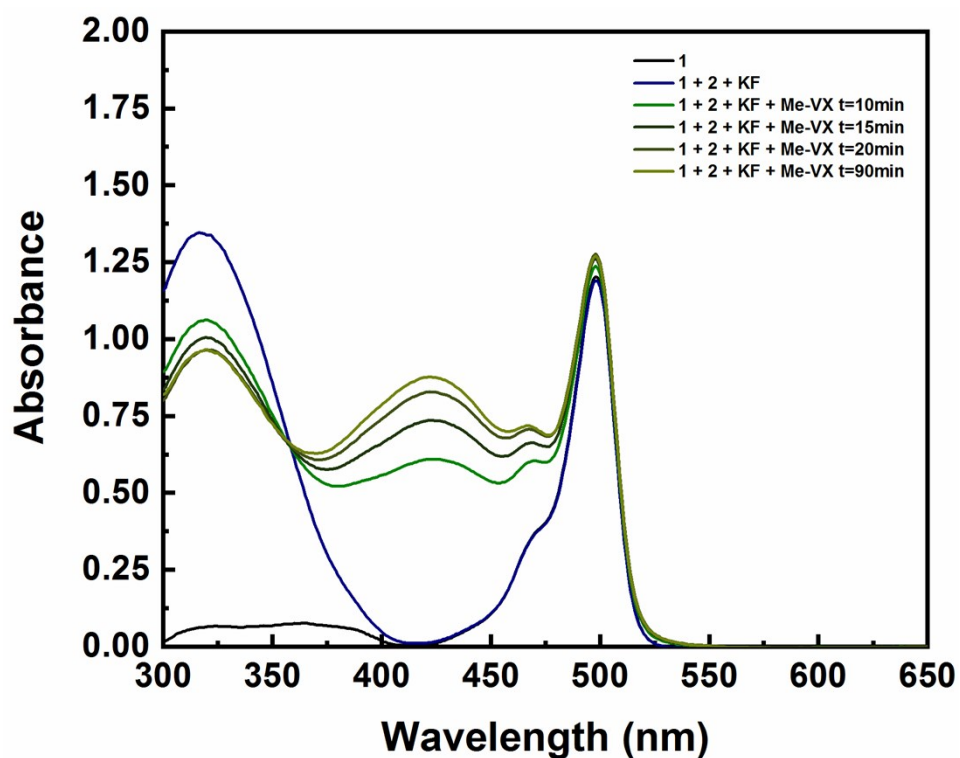

**Figure S7.** Absorption spectra of **1** (20 μM) with **2** (80 μM), KF (80mM) and Me-VX (80μM) recorded in EtOH:H<sub>2</sub>O (1:1).

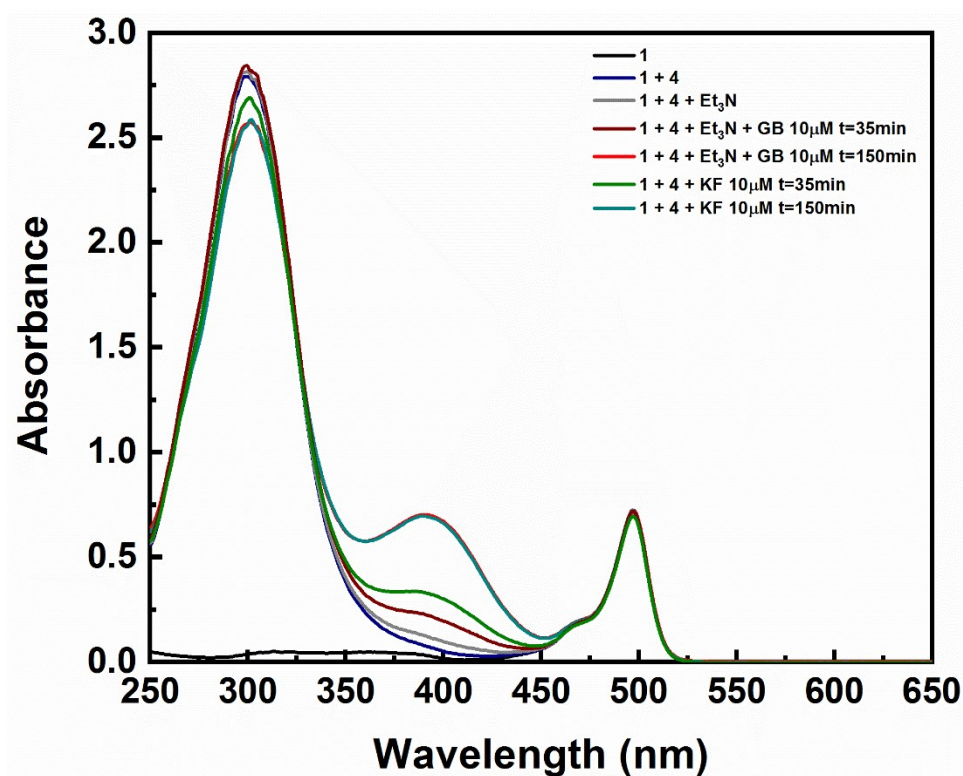

**Figure S8.** Absorption spectra of **1** (10 μM) with **4** (250 μM), Et<sub>3</sub>N (250 μM), KF (10μM) and GB (10μM) recorded in MeOH:H<sub>2</sub>O (9:1).



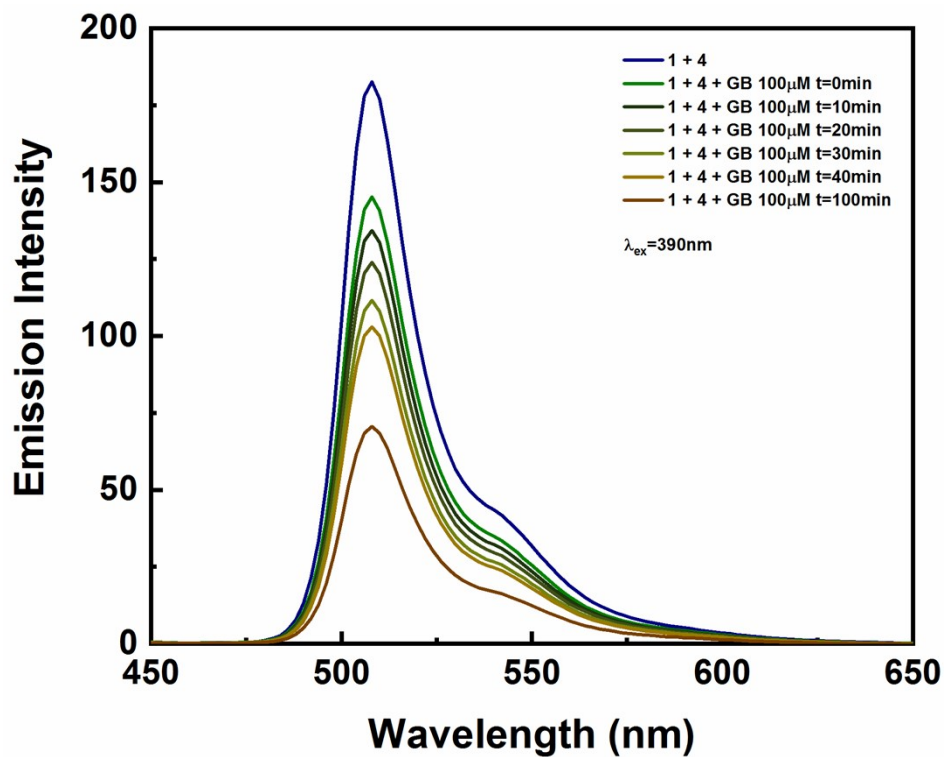

**Figure S9.** Emission spectra of **1** (1  $\mu\text{M}$ ) with **4** (500  $\mu\text{M}$ ), and GB (100 $\mu\text{M}$ ) recorded in MeOH:H<sub>2</sub>O (9:1),  $\lambda_{\text{ex}}$ =390nm.

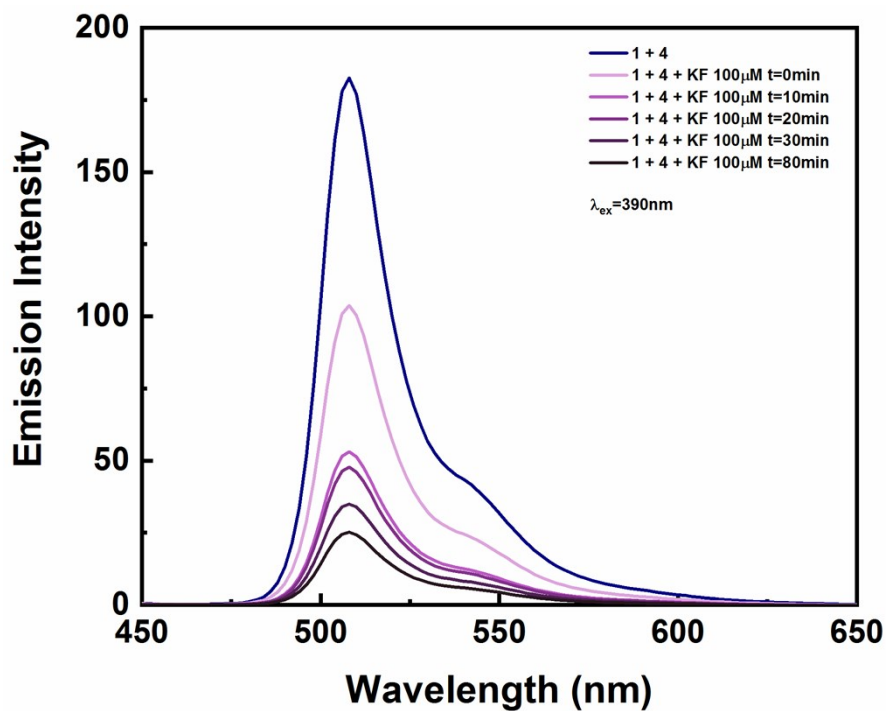

**Figure S10.** Emission spectra of **1** (1  $\mu\text{M}$ ) with **4** (500  $\mu\text{M}$ ), and KF (100 $\mu\text{M}$ ) recorded in MeOH:H<sub>2</sub>O (9:1),  $\lambda_{\text{ex}}$ =390nm.

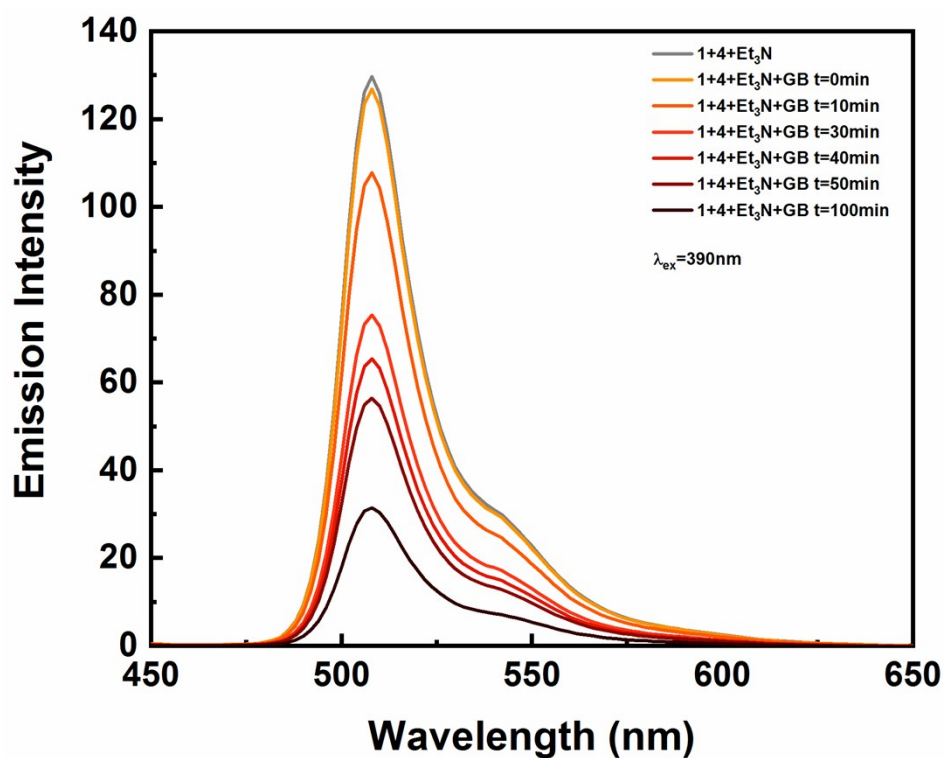

**Figure S11.** Emission spectra of **1** (1 μM) with **4** (500 μM), Et<sub>3</sub>N (500 μM), and GB (100 μM) recorded in MeOH:H<sub>2</sub>O (9:1), λ<sub>ex</sub>=390nm.

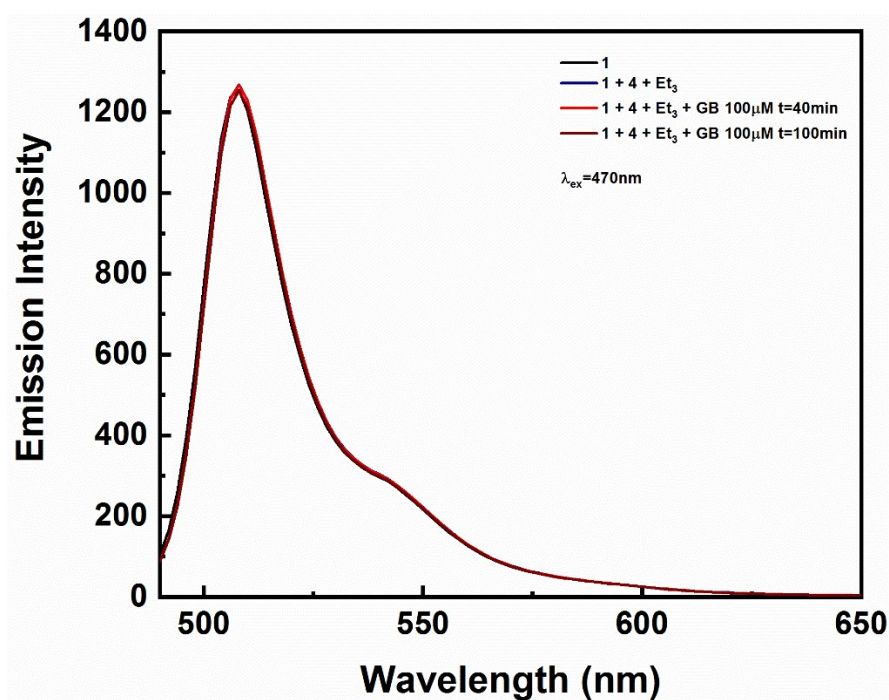

**Figure S12.** Emission spectra of **1** (1 μM) with **4** (500 μM), Et<sub>3</sub>N (500 μM), and GB (100 μM) recorded in MeOH:H<sub>2</sub>O (9:1), λ<sub>ex</sub>=470nm.



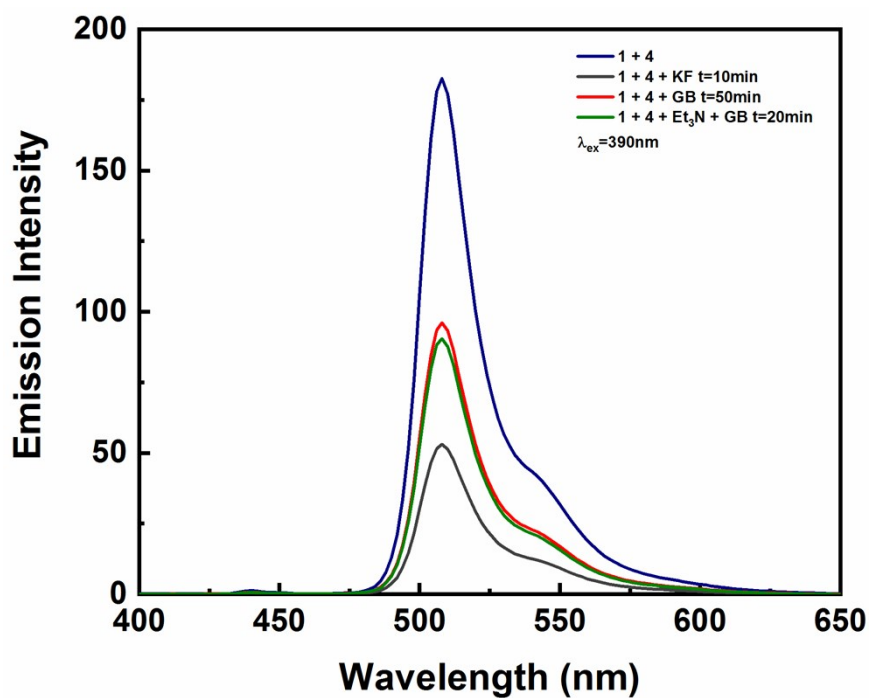

**Figure S13.** Emission spectra of **1** (1  $\mu\text{M}$ ) with **4** (500  $\mu\text{M}$ ),  $\text{Et}_3\text{N}$  (500  $\mu\text{M}$ ), GB (100 $\mu\text{M}$ ), KF (100 $\mu\text{M}$ ) recorded in MeOH:H<sub>2</sub>O (9:1),  $\lambda_{\text{ex}}=390\text{nm}$ .

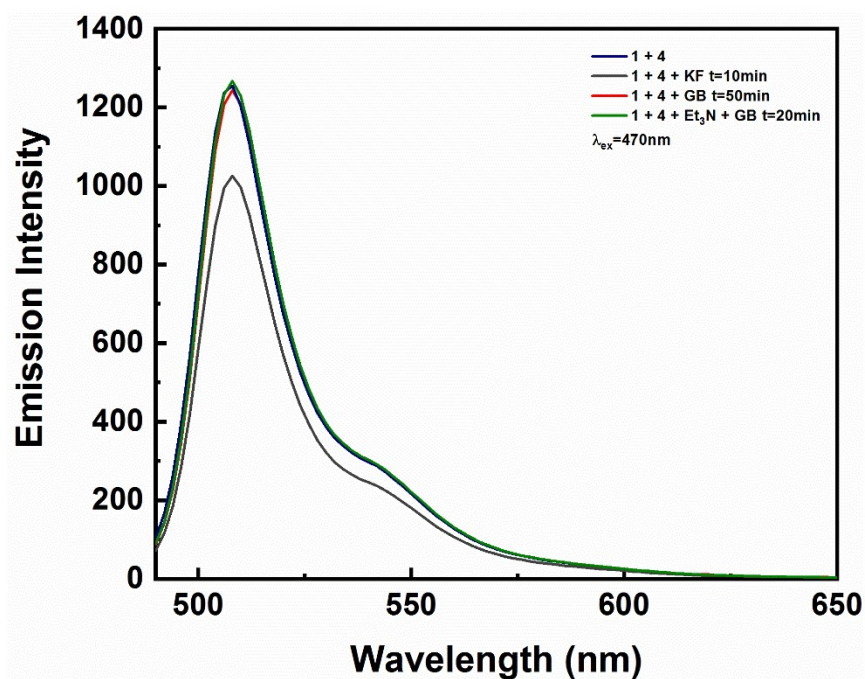

**Figure S14.** Emission spectra of **1** (1  $\mu\text{M}$ ) with **4** (500  $\mu\text{M}$ ),  $\text{Et}_3\text{N}$  (500  $\mu\text{M}$ ), GB (100 $\mu\text{M}$ ), KF (100 $\mu\text{M}$ ) recorded in MeOH:H<sub>2</sub>O (9:1),  $\lambda_{\text{ex}}=470\text{nm}$ .

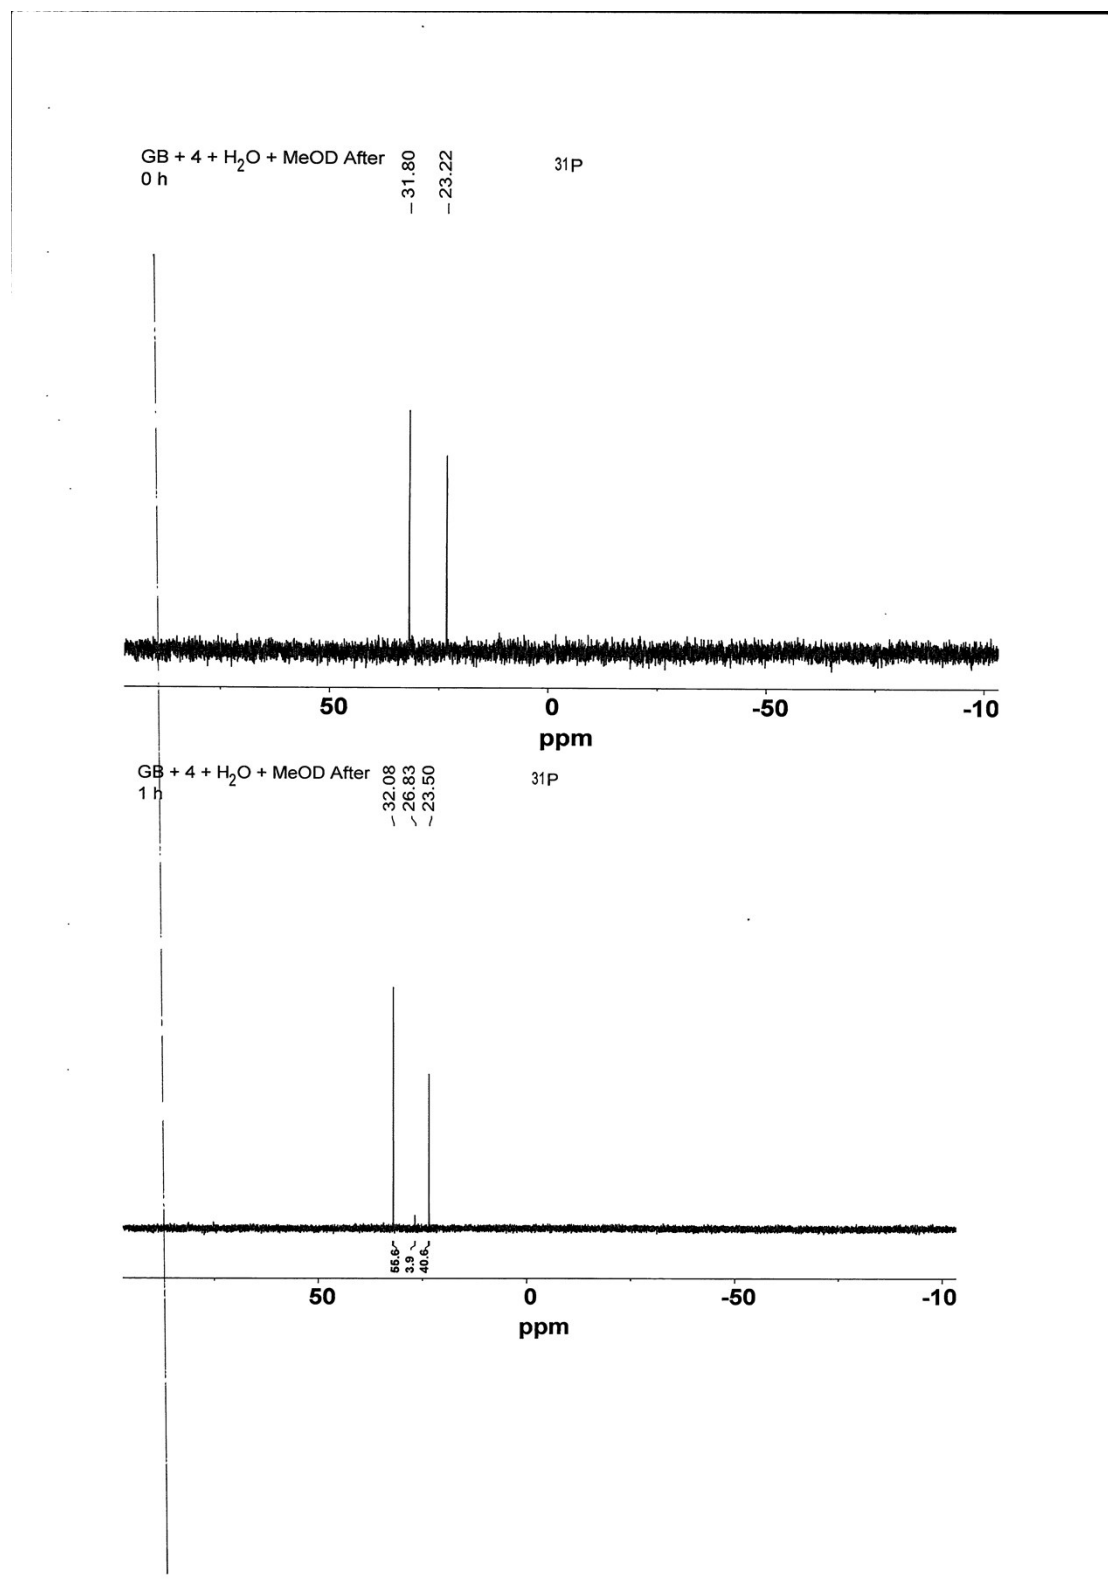

**Figure S15.**  $^{31}\text{P}$  NMR spectra of **GB, 4** and H<sub>2</sub>O in CD<sub>3</sub>OD

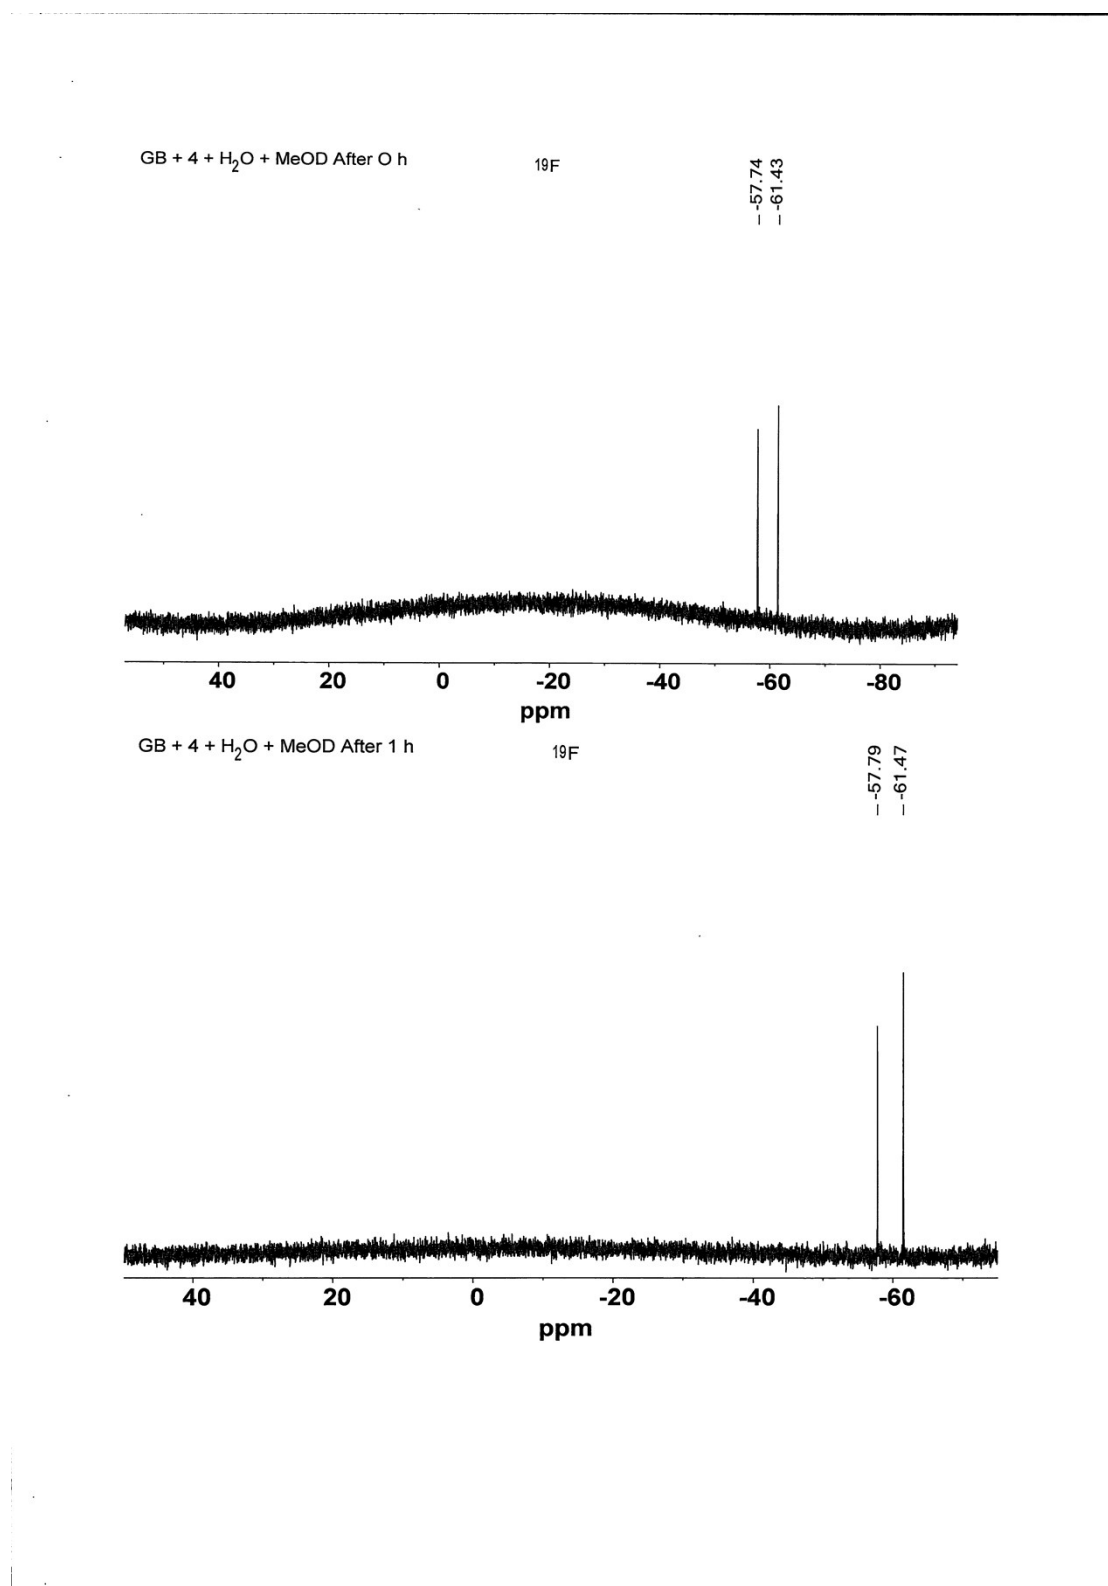

**Figure S16.** <sup>19</sup>F NMR spectra of **GB**, **4** and H<sub>2</sub>O in CD<sub>3</sub>OD
